# Supplementary material
Source: publisher figshare collection journal article supplement (https://acs.figshare.com/ndownloader/files/23509167)
Supplement: Supplementary file 1 [file 23509167]

# Supplementary Information: Selective Elimination of the Homogeneous Broadening by Multidimensional Spectroscopy in EIT Regime

Guangyu Liu<sup>1</sup>, Andrii S. Sizhuk<sup>2</sup>, and Konstantin E. Dorfman<sup>a1\*</sup>

<sup>1</sup>*State Key Laboratory of Precision Spectroscopy and Department of Physics,  
East China Normal University, Shanghai 200062, China and*

<sup>2</sup>*Department of Radiophysics, Kyiv National Taras Shevchenko University,  
Acad. Glushkova Avenue 4-g, Kyiv, Ukraine 03022*

---

<sup>a</sup> dorfmank@lps.ecnu.edu.cn

## S1. MODEL

Consider four-level scheme that represent molecular dimer system described by the Hamiltonian

$$\hat{H}_0 = \sum_j \hbar\omega_j |j\rangle\langle j|, j = b, a_1, a_2, c \quad (\text{S1})$$

where the four level energies have been arranged such that  $\omega_b < \omega_c < \omega_{a_2} < \omega_{a_1}$ . Here  $b$  and  $c$  correspond to the two rovibrational states of the ground electronic state and  $a_1$  and  $a_2$  corresponds to the rovibrational states of the excited electronic state. The Hamiltonian  $\hat{H}_{int}(t)$  for the system interacting with the strong control field is given by Eq.(3). Combining Eqs.(S1) and (3) one can express the total Hamiltonian  $\hat{H} = \hat{H}_0 + \hat{H}_{int}(t)$  in the matrix form:

$$\hat{H} = \begin{pmatrix} \hbar\omega_b & 0 & 0 & 0 \\ 0 & \hbar\omega_{a_1} & 0 & -\frac{\hbar}{2}\Omega_1 e^{-i\nu t} \\ 0 & 0 & \hbar\omega_{a_2} & -\frac{\hbar}{2}\Omega_2 e^{-i\nu t} \\ 0 & -\frac{\hbar}{2}\Omega_1 e^{i\nu t} & -\frac{\hbar}{2}\Omega_2 e^{i\nu t} & \hbar\omega_c \end{pmatrix} \quad (\text{S2})$$

Hereafter we will explore the effects of control field via  $\Omega_1$  and  $\Omega_2$  separately, assuming that CW control field may interact resonantly only with one transition. For instance we set  $\Omega_1 = \Omega$  and  $\Omega_2 = 0$ . The evolution of the system is governed by the Liouville-von Neumann equation Eq.(2). The total density matrix can be recast as

$$\hat{\rho} = \begin{pmatrix} \rho_{bb} & \rho_{ba_1} & \rho_{ba_2} & \rho_{bc} \\ \rho_{a_1b} & \rho_{a_1a_1} & \rho_{a_1a_2} & \rho_{a_1c} \\ \rho_{a_2b} & \rho_{a_2a_1} & \rho_{a_2a_2} & \rho_{a_2c} \\ \rho_{cb} & \rho_{ca_1} & \rho_{ca_2} & \rho_{cc} \end{pmatrix} \quad (\text{S3})$$

While the control field is described to all orders, the probe field is treated perturbatively. The nonlinear polarization is given by

$$\begin{aligned} \mathbf{P}^{(n)}(\mathbf{r}, t) &= \int_0^\infty dt_n \int_0^\infty dt_{n-1} \cdots \int_0^\infty dt_1 S^{(n)}(t_n, t_{n-1}, \dots, t_1) E(\mathbf{r}, t - t_n) \\ &\times E(\mathbf{r}, t - t_n - t_{n-1}) \cdots E(\mathbf{r}, t - t_n - t_{n-1} \cdots - t_1), \end{aligned} \quad (\text{S4})$$

with

$$S^{(n)}(t_n, t_{n-1}, \dots, t_1) \equiv \left(\frac{i}{\hbar}\right)^n \langle \langle V | \mathcal{G}(t_n) \mathcal{V} \mathcal{G}(t_{n-1}) \mathcal{V} \cdots \mathcal{G}(t_1) \mathcal{V} | \rho(-\infty) \rangle \rangle, \quad (\text{S5})$$

where  $\mathcal{G}$  and  $\mathcal{V}$  denote the Green's function and dipole operator in Liouville space, respectively. The photon echo is a third order nonlinear process described by Eq.(1).

We next calculate the coherence Green's functions. By using the unitary transformation method, we got all the 4 Green's functions in Eq. (1) like:

$$\mathcal{G}_{ba_1,ba_1}(\omega_1) = \frac{4(\omega_1 - i\gamma_3 - \omega_{a_1b})}{4(\omega_1 - i\gamma_1^{(1)} - \omega_{a_1b})(\omega_1 - i\gamma_3 - \omega_{a_1b}) - \Omega_1^2} \quad (\text{S6})$$

$$\mathcal{G}_{a_1b,a_1b}(\omega_1) = \frac{4(\omega_1 + i\gamma_3 - \omega_{a_1b})}{4(\omega_1 + i\gamma_1^{(1)} - \omega_{a_1b})(\omega_1 + i\gamma_3 - \omega_{a_1b}) - \Omega_1^2} \quad (\text{S7})$$

$$\mathcal{G}_{a_2b,a_2b}(\omega_3) = \frac{1}{\omega_3 + i\gamma_1^{(2)} - \omega_{a_2b}} \quad (\text{S8})$$

$$\mathcal{G}_{ba_2,ba_2}(\omega_3) = \frac{1}{\omega_3 - i\gamma_1^{(2)} - \omega_{a_2b}} \quad (\text{S9})$$

We next turn to population calculations. To compute populations analytically we assume  $\Gamma$  to be small compared to other parameters such as  $\gamma_2$  and  $\Omega$  and first recast Eq. (4) in a matrix form, setting  $\Gamma = 0$

$$\hat{\mathcal{L}} = \begin{pmatrix} 0 & -\frac{i}{2}\Omega_1 & \frac{i}{2}\Omega_1 & 0 \\ -\frac{i}{2}\Omega_1 & -\gamma_2 & 0 & \frac{i}{2}\Omega_1 \\ \frac{i}{2}\Omega_1 & 0 & -\gamma_2 & -\frac{i}{2}\Omega_1 \\ 0 & \frac{i}{2}\Omega_1 & -\frac{i}{2}\Omega_1 & 0 \end{pmatrix} \quad (\text{S10})$$

To zeroth order in  $\Gamma$  the solution for coherences  $\rho_{a_1c}$ ,  $\rho_{ca_1}$  read:

$$\rho_{a_1c}(t) = -\frac{ie^{-\frac{\gamma_2 t}{2}} \Omega \sinh\left(\frac{t}{2}\sqrt{\gamma_2^2 - 4\Omega^2}\right)}{\sqrt{\gamma_2^2 - 4\Omega^2}} \quad (\text{S11})$$

$$\rho_{ca_1}(t) = \frac{ie^{-\frac{\gamma_2 t}{2}} \Omega \sinh\left(\frac{t}{2}\sqrt{\gamma_2^2 - 4\Omega^2}\right)}{\sqrt{\gamma_2^2 - 4\Omega^2}} \quad (\text{S12})$$

Then we substitute Eqs.(S11) - (S12) into Eq.(4) and transform it into first-order differential equation. We assume that only  $|a_1\rangle$  was populated after the first period  $t_1$ , namely:  $\rho_{a_1a_1} = 1$  and  $\rho_{a_2a_2} = 0$ , thus the initial condition in second period is like this, then the solution of  $\rho_{a_1a_1}(t)$  in the second period is given by Eq. (7) of the main text. We then find the expression of  $\rho_{a_2a_2}$  using the zero-order expression for  $\rho_{a_1a_1}$  using the long term asymptotic decay:

$$\rho_{a_1a_1}^{(0)}(t) = -\Gamma\rho_{a_1a_1}^{(0)} \quad (\text{S13})$$

we obtain

$$\rho_{a_1a_1}^{(0)}(t) = e^{-\Gamma t}. \quad (\text{S14})$$

We thus find the expression for  $\rho_{a_2a_2}$ :

$$\rho_{a_2a_2}(t) \simeq 1 - e^{-\Gamma t} \quad (\text{S15})$$

Last, we utilize the population conservation condition and obtain for  $\rho_{cc}$

$$\rho_{cc}(t) = 1 - \rho_{a_1a_1}(t) - \rho_{a_2a_2}(t) \quad (\text{S16})$$

Similarly we obtain for the initial conditions  $\rho_{a_1a_1}(0) = 0$  and  $\rho_{a_2a_2}(0) = 1$ :

$$\rho_{a_1a_1}(t) = 0, \quad (\text{S17})$$

$$\rho_{a_2a_2}(t) = 1, \quad (\text{S18})$$

$$\rho_{cc}(t) = 0. \quad (\text{S19})$$

So far we considered the case when the control field is resonant with  $a_1 - c$  transition by setting  $\Omega_1 = \Omega$  and  $\Omega_2 = 0$ . We now turn to the case when the control field drives  $a_2 - c$  transition by setting  $\Omega_1 = 0$  and  $\Omega_2 = \Omega$ . Considering initial conditions  $\rho_{a_1a_1}(0) = 1$  and  $\rho_{a_2a_2}(0) = 0$ , the populations can be similarly obtained:

$$\rho_{a_1a_1}(t) \simeq e^{-\Gamma t}, \quad (\text{S20})$$

$$\rho_{a_2a_2} \simeq \rho_{cc}(t) \simeq \frac{1}{2}[1 - e^{-\Gamma t}]. \quad (\text{S21})$$

Finally using initial conditions  $\rho_{a_1a_1}(0) = 0$  and  $\rho_{a_2a_2}(0) = 1$ , we obtain the solution:

$$\rho_{a_1a_1}(t) = 0, \quad (\text{S22})$$

$$\rho_{a_2a_2}(t) \simeq \frac{1}{2} \left[ 1 + e^{-\frac{\gamma_2 t}{2}} \left( \cosh(\tilde{\Omega} t) + \frac{\gamma_2 \sinh(\tilde{\Omega} t)}{2\tilde{\Omega}} \right) \right], \quad (\text{S23})$$

$$\rho_{cc}(t) \simeq \frac{1}{2} \left[ 1 - e^{-\frac{\gamma_2 t}{2}} \left( \cosh(\tilde{\Omega} t) + \frac{\gamma_2 \sinh(\tilde{\Omega} t)}{2\tilde{\Omega}} \right) \right]. \quad (\text{S24})$$

## S2. DETAILS OF THE SIMULATIONS FOR $Cs_2$ DIMER

We now simulate results for cesium dimer using realistic parameters. The spectra is given by:

$$G(\nu) = E_\nu / hc = \omega_e(\nu + 1/2) - \omega_e \chi_e(\nu + 1/2)^2 \quad (\text{S25})$$

where the coefficients for the ground electronic state  $X^1\Sigma_g^-$ :  $\omega_e$  is  $41.990 \text{ cm}^{-1}$  and  $\omega_e\chi_e$  is  $0.08005 \text{ cm}^{-1}$ ; and for the excited electronic state  $B^1\Pi_u$ :  $\omega_e$  is  $34.230 \text{ cm}^{-1}$  and  $0.07799 \text{ cm}^{-1}$ . Although it has both linear and nonlinear terms but the coefficient of the nonlinear term  $\omega_e\chi_e$  is much smaller than that of the linear term (approximately 4 orders of magnitude smaller). The maximum of the vibrational quantum number  $\nu$  is 12. We then obtain for the ground state  $X^1\Sigma_g^-$ :  $E_{\nu=0} = 21.02 \text{ cm}^{-1}$ ,  $E_{\nu=1} = 62.51 \text{ cm}^{-1}$ ,  $E_{\nu=2} = 104.85 \text{ cm}^{-1}$ ,  $E_{\nu=3} = 145.18 \text{ cm}^{-1}$ ,  $E_{\nu=5} = 228.97 \text{ cm}^{-1}$ ,  $E_{\nu=6} = 270.08 \text{ cm}^{-1}$ . We similarly obtain for the excited state  $B^1\Pi_u$ :  $E_{\nu=0} = 17.10 \text{ cm}^{-1}$ ,  $E_{\nu=1} = 51.62 \text{ cm}^{-1}$ ,  $E_{\nu=2} = 85.49 \text{ cm}^{-1}$ ,  $E_{\nu=3} = 118.56 \text{ cm}^{-1}$ ,  $E_{\nu=5} = 186.27 \text{ cm}^{-1}$ ,  $E_{\nu=6} = 219.63 \text{ cm}^{-1}$ . By comparison we conclude that the energy gap of the excited state is narrower than that in ground state. Furthermore the rotational spectra values  $F(J) = E_J/hc$  is:

$$F(J) = B_e J(J+1) - D_e J^2(J+1)^2 \quad (\text{S26})$$

where  $B_e = \frac{h}{8\pi^2 I_e} = 0.036 \text{ cm}^{-1}$ , where  $I_e = \mu r_e^2$ , is the moment of inertia; the constant  $D_e = \frac{4B_e^3}{\omega_e^2} = 1.058 \times 10^{-7}$  for  $X^1\Sigma_g^- \text{ cm}^{-1}$  and  $1.59 \times 10^{-7} \text{ cm}^{-1}$  for  $B^1\Pi_u$ . Since the coefficient of the nonlinear term  $\omega_e\chi_e$  is much smaller than that of linear term (about 5 orders of magnitude smaller), difference in the values between the ground and optically excited is negligible. The maximum of the rotational quantum number  $J$  defined by constraint in perturbative expansion is 583. Thus, we get for  $X^1\Sigma_g^-$  state:  $E_{J=10} = 3.96406 \text{ cm}^{-1}$ ,  $E_{J=11} = 4.75657 \text{ cm}^{-1}$ ,  $E_{J=12} = 5.62098 \text{ cm}^{-1}$ , for  $B^1\Pi_u$  state:  $E_{J=10} = 3.96342 \text{ cm}^{-1}$ ,  $E_{J=11} = 4.75564 \text{ cm}^{-1}$ ,  $E_{J=12} = 5.61972 \text{ cm}^{-1}$ .

The total energy is  $E_{0,10} = E_{\nu''=0} + E_{J''=10} = 21.02 + 3.96406 = 24.9841 \text{ cm}^{-1}$ , similarly we get  $E_{1,10} = E_{\nu''=1} + E_{J''=10} = 62.51 + 3.96406 = 66.4741 \text{ cm}^{-1}$ ,  $E_{1,11} = E_{\nu''=1} + E_{J''=11} = 62.51 + 4.75657 = 67.2666 \text{ cm}^{-1}$ ,  $E_{1,12} = E_{\nu''=1} + E_{J''=12} = 62.51 + 5.62098 = 68.131 \text{ cm}^{-1}$ ,  $E_{2,11} = E_{\nu''=2} + E_{J''=11} = 104.85 + 4.75657 = 109.607 \text{ cm}^{-1}$ ,  $E_{2,12} = E_{\nu''=2} + E_{J''=12} = 104.85 + 5.62098 = 110.471 \text{ cm}^{-1}$ ,  $E_{3,10} = E_{\nu''=3} + E_{J''=10} = 145.18 + 3.96406 = 149.144 \text{ cm}^{-1}$ ,  $E_{3,12} = E_{\nu''=3} + E_{J''=12} = 145.18 + 5.62098 = 150.801 \text{ cm}^{-1}$ .

Similarly for  $B^1\Pi_u$ ,  $E_{0,10} = E_{\nu''=0} + E_{J''=10} = 17.10 + 3.96342 = 21.0634 \text{ cm}^{-1}$ ,  $E_{1,10} = E_{\nu''=1} + E_{J''=10} = 51.62 + 3.96342 = 55.5834 \text{ cm}^{-1}$ ,  $E_{1,11} = E_{\nu''=1} + E_{J''=11} = 51.62 + 4.75564 = 56.3756 \text{ cm}^{-1}$ ,  $E_{1,12} = E_{\nu''=1} + E_{J''=12} = 51.62 + 5.61972 = 57.2397 \text{ cm}^{-1}$ ,  $E_{2,11} = E_{\nu''=2} + E_{J''=11} = 85.49 + 4.75564 = 90.2456 \text{ cm}^{-1}$ ,  $E_{2,12} = E_{\nu''=2} + E_{J''=12} = 85.49 + 5.61972 = 91.1097 \text{ cm}^{-1}$ .

$cm^{-1}$ ,

We can then choose the parameters of the probe pulses such that it can excite both states  $a_1$  and  $a_2$  simultaneously and observe the population dynamics. We can thus set the control and probe pulse bandwidth  $62.51cm^{-1}$  and  $104.81cm^{-1}$ , respectively. The pure lifetime broadening is given by:

$$\Gamma \sim \tilde{\Gamma}_{e'e} = \frac{\omega_{a_1a_2}k_BT}{\hbar\Lambda_a} \quad \gamma_3 \sim \tilde{\Gamma}_{g'g} = \frac{\omega_{bc}k_BT}{\hbar\Lambda_b} \quad (S27)$$

Assuming collisional broadening with  $\gamma_{col} \simeq 50cm^{-1}$ , the dephasing rates are given by:  $\gamma_1 \simeq 50cm^{-1}, \gamma_2 \simeq 50cm^{-1}, \gamma_3 = 0.01cm^{-1}$ , and for the population relaxation rate between vibrational states  $\nu' = 1$  and  $\nu' = 2$ ,  $\Gamma = 0.03cm^{-1}$ .

To finalize the states for simulations we select for  $X^1\Sigma_g^-$ :  $\nu'' = 1$  and  $J'' = 10$  and  $\nu'' = 3$  and  $J'' = 12$ . For  $B^1\Pi_u$ , we select  $\nu' = 1$  and  $J' = 10$  and  $\nu' = 2$  and  $J' = 11$ . Thus  $\nu'' = 1, J'' = 10$  corresponding to  $|b\rangle$ , which is the lowest energy level; and  $\nu'' = 3, J'' = 12$  corresponding to the energy level  $|c\rangle$ ,  $\nu' = 1, J' = 10$  corresponding to  $|a_2\rangle$  and  $\nu' = 2, J' = 11$  correspond to  $|a_1\rangle$ .

### S3. SIMULATIONS FOR THE $a_2 - c$ DRIVEN BY CONTROL FIELD.

It has been mentioned that the optimum control field strength determined by the overlap between the position of the  $\omega_{a_1b}^-$  peak and the  $\omega_{a_2b}$  obtained at  $\Omega = 2(\omega_{a_1b} - \omega_{a_2b})$ . Fig. S1 depicts the imaginary part of Eq. (5) and Eq. (6) to illustrate this point.

Fig. S2 depicts the two dimensional(2D) spectra in the case when the control field is resonant with the  $a_2 - c$  transition using the population dynamics solution of Eqs. (S21) - (S25). In this case optimum case corresponds to matching  $\omega_{a_1b} = \omega_{a_2b}^+$  obtained at  $\Omega = 2(\omega_{a_1b} - \omega_{a_2b})$ .

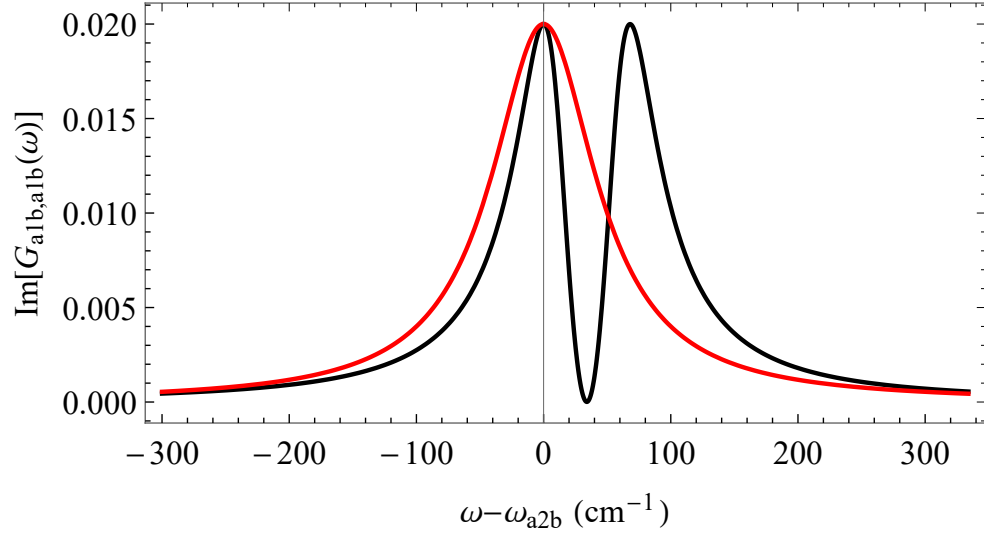

Figure S1. (color online): Imaginary part of the coherence Green's function in Eq. (5) - black and Eq. (6) - red.

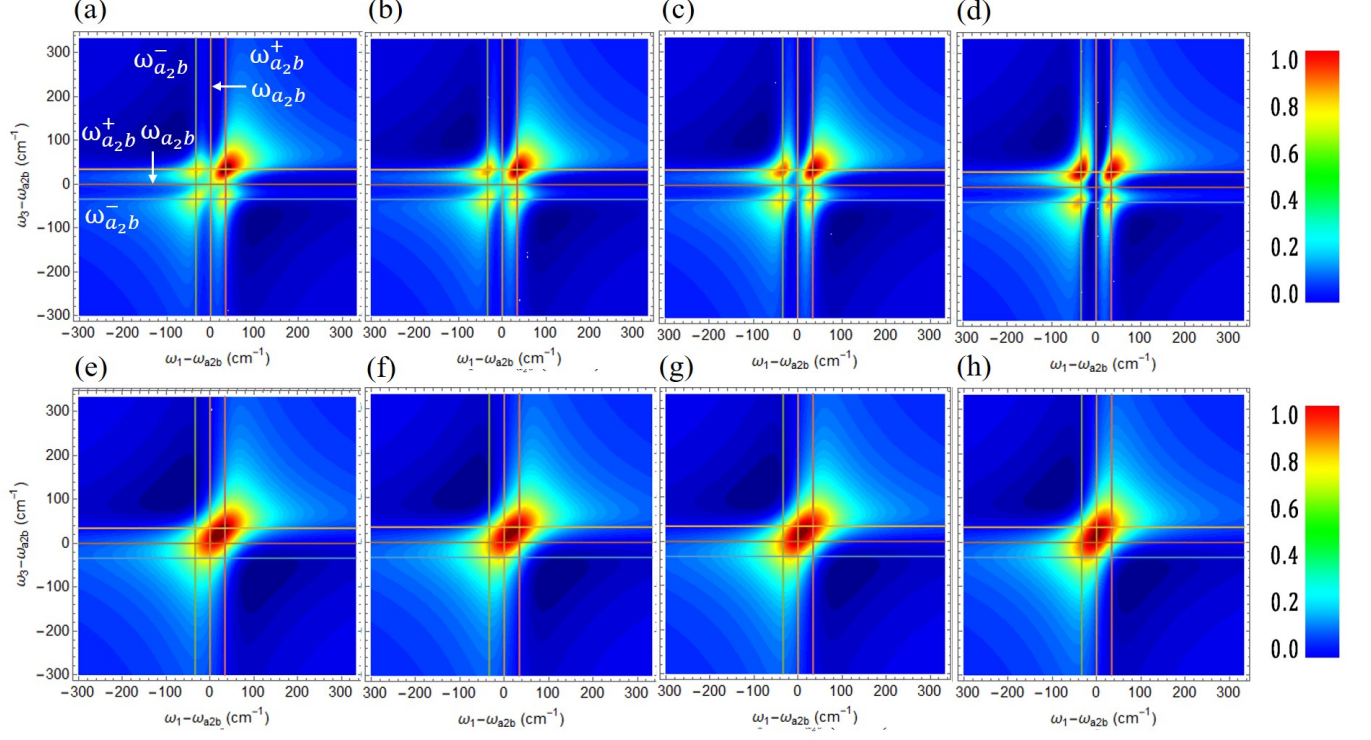

Figure S2. (color online): same as Fig. 3 in the main text, but assuming control field resonant with  $a_2 - c$  transition. Three horizontal and vertical lines correspond to  $\omega_{a_{1,2}b}$  as well as  $\omega_{a_2b}^\pm \simeq \omega_{a_2b} \pm \Omega/2$ . The control field strength is chosen such that  $\omega_{a_2b}^+ \equiv \omega_{a_1b}$ .
